# Supplementary material
Source: PubMed Central journal article supplement (PMC6153846)

## Supplementary Figure Legends

**Movie S1.** Representative timelapse of wt *V. cholerae* sphere recovery. Cells were exposed to PenG in M9 MM + glucose, followed by washing and transfer to an agarose pad containing M9 MM + glucose. Frames are 5 min apart.

**Table S1** Oligonucleotides used in this study

**Table S2** Strains and plasmids

**Figure S1.** Fluorescent protein fusion to PBP1a is functional. Overnight cultures of the indicated strains were plated on LB agar containing  $100 \mu\text{g ml}^{-1}$  cefsulodin, an inhibitor of PBP1B (1).

**Figure S2.** HADA staining in recovering spheres treated with inhibitors of aPBPs or the Rod system. Frames are taken from the experiment as shown in **Figure 4**. The pixel intensity range was set to 100 – 2000 in all images to illustrate the above background fluorescence in moenomycin-treated cells. Note that this results in overexposure of the untreated sample image.

**Figure S3. A)** TnSeq hits below the cutoff ( $\geq 10$ -fold fitness defect,  $p\text{-val} < 0.01$ ). **B)** representative Artemis plots of the genes encoding Heptosyltransferase I (*vc0225*) and

the Sigma E operon. POST results from analyses Post-antibiotic; OG results from analyses after post-antibiotic outgrowth.

**Figure S4.** Silver stain of *V. cholerae* isolated outer membranes, comparing wild type and the *vc0225* mutant. The red arrow points to high molecular weight structures, likely core + O-antigen, M, marker.

**Figure S5.** Polymyxin sensitivity of *alm* and *eptA* mutants. Overnight cultures of the indicated strains were plated on LB agar containing Polymyxin B at 10  $\mu\text{g ml}^{-1}$  and IPTG (100  $\mu\text{M}$ ) where applicable.

### Supplementary References

1. Dorr T, Moll A, Chao MC, Cava F, Lam H, Davis BM, Waldor MK. 2014. Differential requirement for PBP1a and PBP1b in in vivo and in vitro fitness of *Vibrio cholerae*. *Infect Immun* 82:2115-24.
2. Chao MC, Zhu S, Kimura S, Davis BM, Schadt EE, Fang G, Waldor MK. 2015. A Cytosine Methyltransferase Modulates the Cell Envelope Stress Response in the Cholera Pathogen [corrected]. *PLoS Genet* 11:e1005666.

| Primer # | Primer name    | sequence (5'-3')                                                                |
|----------|----------------|---------------------------------------------------------------------------------|
| TDP1434  | mrcArevmCherry | <u>CCTCCTCGCCCTTGCTCAC</u> <b>gagctcgaggatg</b> tcGAACAGCTCTTCACCAGAGCTGG       |
| TDP1435  | mrcAfwCherry   | <u>GGCATGGACGAGCTGTACAAG</u> <b>gacatcctcgagctc</b> TAGTAACTCTGGTACAGAAAACCGAAT |
| TDP1436  | mCherryfw      | <b>gacatcctcgagctc</b> GTGAGCAAGGGCGAGGAGG                                      |
| TDP1437  | mCherryrev     | <b>gagctcgaggatg</b> tcCTTGACAGCTCGTCCATGCC                                     |
| TDP1362  | mrcAfwCVD      | <u>aggatatgtgatgggttaaaaaggatcgatcc</u> CTTGACATCCATCAACACTGGTTC                |
| DLP401   | vc0225fwGP     | <u>gcagatcgcaggtcgacggatccaagctct</u> ccccacactccctctgtatcctg                   |
| DLP402   | vc0225revpGP   | <u>ccgggagagctcgatatcgcatg</u> cggtacctctagaccatctaagacgtgcattttgtcc            |
| DLP397   | vc0212fwGP     | <u>gcagatcgcaggtcgacggatccaagctct</u> ttggcatcgcttcgcagc                        |
| DLP398   | vc0212revpGP   | <u>ccgggagagctcgatatcgcatg</u> cggtacctctagaccatactgcatacgttggacg               |
| DLP519   | almpCVDfw      | ATATGTGATGGGTTAAAAAGGATCGATCCTATTGGCTCGGTGGCGACC                                |
| DLP520   | almrev         | <b>TCATCATTATTACTCGAGTGGCGCCGCATTA</b> CAACTAGTTGTGCGAGCAACCGATT                |
| DLP521   | almfw          | <b>TAATGCGGCCGCACTCGAGTAATAATGATGA</b> TGAAAGCAATTCGGTGTATCTAAGAAGTTGA          |
| DLP522   | almrevpCVD     | <u>AGAGCTCGATATCGCATGCGGTACCTCTAGT</u> CCCTTTGGCCGACTCTAAAATC                   |
| DLP539   | eptAfwCVD      | ATATGTGATGGGTTAAAAAGGATCGATCCTGGCATCAGTGGTGATAGCGG                              |
| DLP540   | eptARev        | <b>TCATCATTATTACTCGAGTGGCGCCGCATTA</b> GACCACGCTAAATTCTGTGAACGTT                |
| DLP541   | eptAfw         | <b>TAATGCGGCCGCACTCGAGTAATAATGATGA</b> TAGCCATACCCAAACAACTTAGCC                 |
| DLP542   | eptarevpCVD    | <u>AGAGCTCGATATCGCATGCGGTACCTCTAG</u> AAGTACACAAACCTTAAGGAAACAGCCG              |
| DLP232   | pbp1ArevpCVD   | <u>AGAGCTCGATATCGCATGCGGTACCTCTAG</u> TTTACTGCCGAAGATCATTCTACTTTG               |

underlined = homology overhang for ITA cloning

bold = linker

| <b>Strain #</b> | <b>Strain name/genotype</b>                      | <b>antibiotic resistance</b> | <b>source</b>                           |
|-----------------|--------------------------------------------------|------------------------------|-----------------------------------------|
| WT              | WT N16961                                        | smR                          |                                         |
| TDW1004         | N16961 <i>pbp1a::pbp1amcherry</i>                | smR                          | this study                              |
| DL-1            | TDW1004 <i>vc0225::pGPkan</i>                    | smR kanR                     | this study                              |
| DL-2            | N16961 $\Delta$ <i>alm</i> $\Delta$ <i>eptA</i>  | smR                          | this study                              |
| DL-3            | N16961 <i>vc0225::pGPkan</i>                     | smR kanR                     | this study                              |
| DL-4            | N16961 <i>vc0212::pGPkan</i>                     | smR kanR                     | this study                              |
| DL-5            | N16961 <i>vc0225::pGPkan</i>                     | smR kanR                     | this study                              |
| DL-6            | N16961 <i>vc0212::pGPkan</i>                     | smR kanR                     | this study                              |
| DL-7            | DL-2 <i>vc0225::pGPkan</i>                       | smR kanR                     | this study                              |
| DL-8            | DL-2 <i>vc0212::pGPkan</i>                       | smR kanR                     | this study                              |
| DL-9            | DL-3 <i>lacZ::Ptac:vc0225</i>                    | smR                          | this study                              |
| DL-10           | DL-4 <i>lacZ::Ptac:vc0212</i>                    | smR                          | this study                              |
|                 | N16961 $\Delta$ <i>ompU</i> $\Delta$ <i>rpoE</i> | smR                          | Chao et al. (2015) Plos Genetics 11 (2) |
|                 | N16961 $\Delta$ <i>ompU</i>                      | smR                          | Chao et al. (2015) Plos Genetics 11 (2) |

LB

100  $\mu\text{g/ml}$  cefsulodin

WT

$\Delta pbp1a$

$pbp1a::$

$pbp1amCherry$

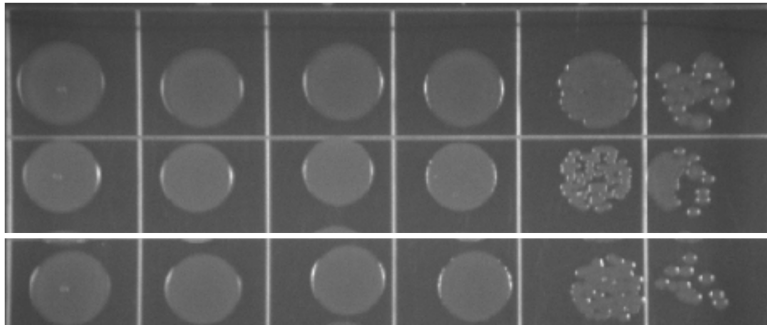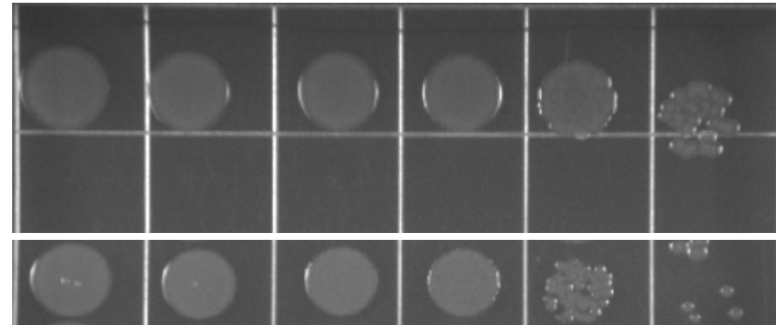

No AB

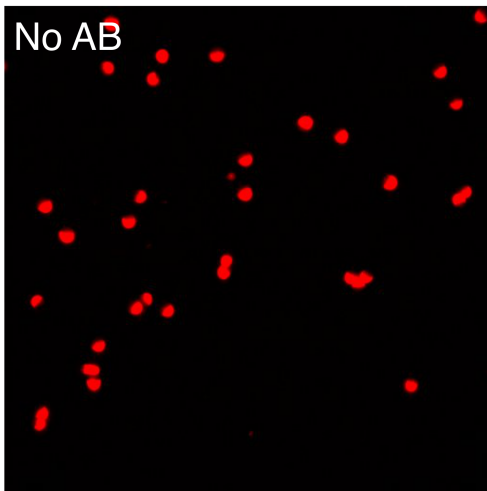

MP265

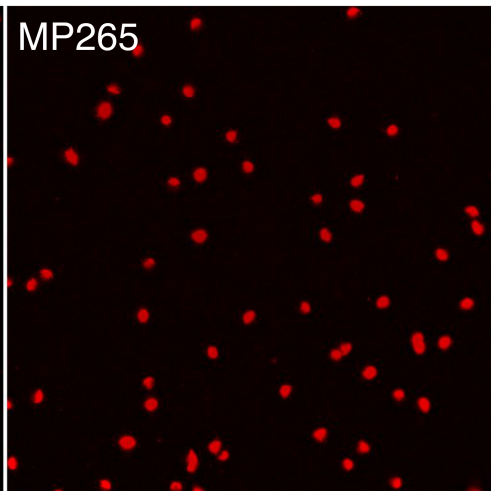

moeno

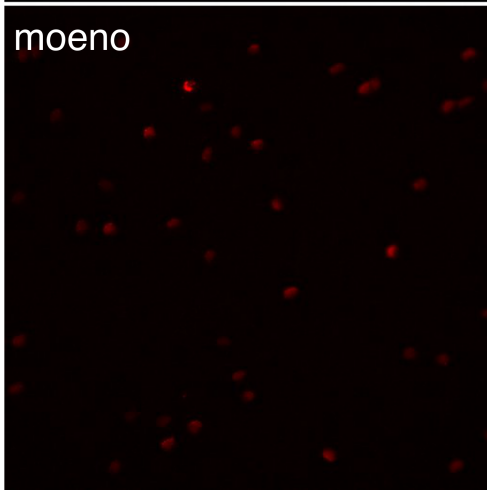

No HADA

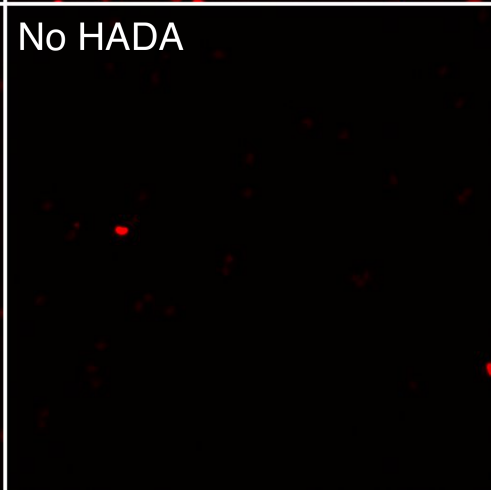

| gene name | annotation                                                      | putative role                   | fold change |
|-----------|-----------------------------------------------------------------|---------------------------------|-------------|
| VC_2270   | riboflavin synthase subunit alpha                               | Riboflavin biosynthesis         | 257         |
| VC_2271   | riboflavin-specific deaminase                                   | Riboflavin biosynthesis         | 139         |
| VC_0724   | phosphate ABC transporter permease                              | Phosphate regulation            | 121         |
| VC_1716   | condensin subunit F                                             | Chromosome condensation         | 109         |
| VC_2153   | D,D-carboxypeptidase-like protein                               | peptidoglycan metabolism        | 109         |
| VC_1714   | cell division protein MukB                                      | Chromosome condensation         | 90          |
| VC_0212   | lipid A biosynthesis (KDO)2-(lauroyl)-lipid IVA acyltransferase | lipopolysaccharide metabolism   | 89          |
| VC_1263   | GTP cyclohydrolase II/ribA                                      | Riboflavin biosynthesis         | 86          |
| VC_2312   | murein transglycosylase A                                       | peptidoglycan metabolism        | 85          |
| VC_0374   | glucose-6-phosphate isomerase                                   | carbon metabolism               | 81          |
| VC_1894   | hypothetical protein VC1894/LpoB                                | peptidoglycan metabolism        | 77          |
| VC_1715   | condensin subunit E                                             | Chromosome condensation         | 77          |
| VC_0761   | hypothetical protein VC0761/yjgM                                | envelope stress response        | 48          |
| VC_0225   | lipopolysaccharide biosynthesis protein                         | lipopolysaccharide metabolism   | 40          |
| VC_0851   | small protein A/BamE                                            | outer membrane metabolism       | 40          |
| VC_2635   | penicillin-binding protein 1A                                   | peptidoglycan metabolism        | 39          |
| VC_0908   | D,D-heptose 1,7-bisphosphate phosphatase                        | capsule biosynthesis            | 38          |
| VC_2465   | periplasmic negative regulator of sigmaE                        | envelope stress response        | 36          |
| VC_0936   | polysaccharide export-like protein                              | capsule biosynthesis            | 35          |
| VC_0236   | ADP-heptose-LPS heptosyltransferase II                          | lipopolysaccharide metabolism   | 33          |
| VC_0289   | gluconate utilization system gnt-I transcriptional repressor    | carbon metabolism               | 33          |
| VC_A0647  | hypothetical protein VCA0647                                    | unknown                         | 29          |
| VC_0034   | thiol:disulfide interchange protein                             | unknown                         | 29          |
| VC_A0424  | hypothetical protein VCA0424/DUF3709                            | unknown                         | 28          |
| VC_2629   | shikimate kinase I                                              | amino acid biosynthesis         | 27          |
| VC_0370   | hypothetical protein VC0370/ydIY                                | salt-induced OM protein         | 26          |
| VC_1630   | ABC transporter ATP-binding protein/LolD                        | lipoprotein export              | 23          |
| VC_1021   | LuxO repressor protein                                          | quorum sensing                  | 23          |
| VC_0240   | ADP-L-glycero-D-manno-heptose-6-epimerase                       | lipopolysaccharide metabolism   | 21          |
| VC_0952   | hypothetical protein VC0952/rsfS                                | ribosome downregulation         | 19          |
| VC_A0804  | ATP-dependent RNA helicase DeaD                                 | RNA metabolism                  | 18          |
| VC_0237   | O-antigen ligase waaL                                           | lipopolysaccharide metabolism   | 18          |
| VC_1039   | asmA protein                                                    | outer membrane metabolism       | 18          |
| VC_0984   | cholera toxin transcriptional activator                         | pathogenesis                    | 17          |
| VC_0431   | arginine repressor ArgR                                         | amino acid biosynthesis         | 17          |
| VC_2322   | exonuclease V subunit gamma-RecC                                | DNA recombination and repair    | 16          |
| VC_A0448  | hypothetical protein VCA0448                                    | unknown                         | 15          |
| VC_0547   | aspartate kinase                                                | amino acid biosynthesis         | 15          |
| VC_2298   | lipoprotein                                                     | unknown                         | 15          |
| VC_1697   | Short-chain dehydrogenases/reductases                           | central metabolism              | 14          |
| VC_0377   | hypothetical protein VC0377/CheX                                | chemotaxis                      | 14          |
| VC_0346   | tRNA delta(2)-isopentenylpyrophosphate transferase              | tRNA modification               | 14          |
| VC_A0645  | hypothetical protein VCA0645                                    | unknown                         | 14          |
| VC_0378   | zinc uptake regulation protein                                  | metal homeostasis               | 13          |
| VC_0003   | tRNA modification GTPase TrmE                                   | tRNA modification               | 13          |
| VC_A0344  | hypothetical protein VCA0344                                    | unknown                         | 13          |
| VC_A0395  | hypothetical protein VCA0395                                    | unknown                         | 13          |
| VC_0632   | D-alanyl-D-alanine carboxypeptidase/endopeptidase               | peptidoglycan metabolism        | 11          |
| VC_1682   | peptide ABC transporter permease                                | antimicrobial peptide transport | 11          |
| VC_0665   | Fis family transcriptional regulator                            | exopolysaccharide synthesis     | 11          |
| VC_A0573  | DamX-like protein                                               | cell division                   | 11          |
| VC_0223   | ADP-heptose-LPS heptosyltransferase II                          | lipopolysaccharide metabolism   | 11          |
| VC_0727   | transcriptional regulator PhoU                                  | Phosphate regulation            | 10          |
| VC_2320   | exodeoxyribonuclease V/RecB                                     | DNA recombination and repair    | 10          |
| VC_A0405  | hypothetical protein VCA0405                                    | unknown                         | 10          |
| VC_1700   | intracellular septation protein A                               | unknown                         | 10          |

**vc0225**

OG

POST

vc0225

**Sigma E operon**

OG

POST

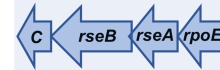

M

WT

vc0225::kan

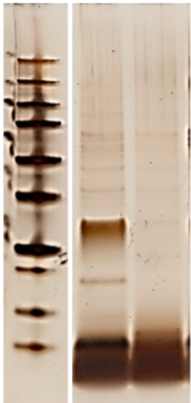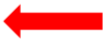



**A**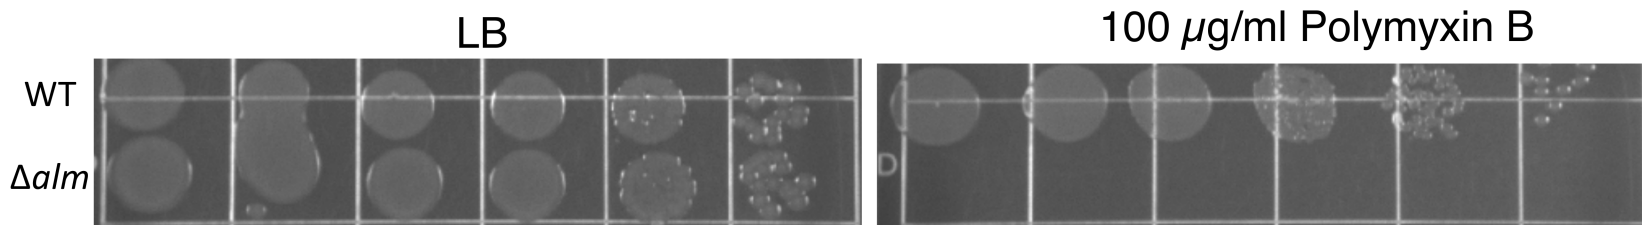**B**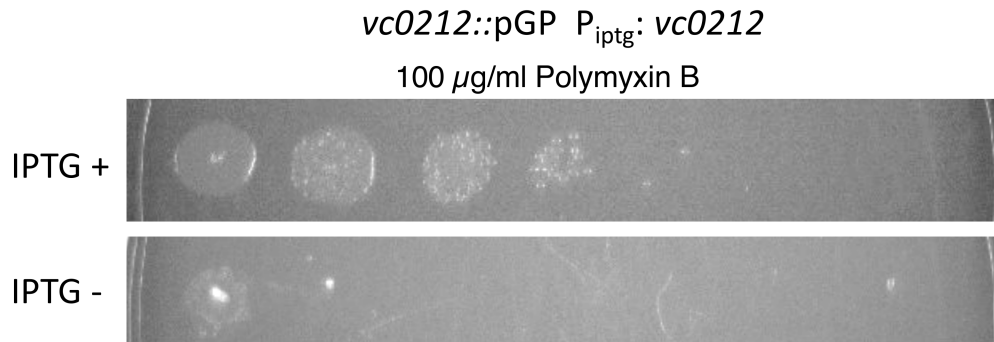

Supplement: zac010187528s1.pdf [file zac010187528s1.pdf]
